# Supplementary material
Source: MDPI journal article supplement (https://www.mdpi.com/2076-3417/12/3/1083)
Supplement: s1 [file s1]

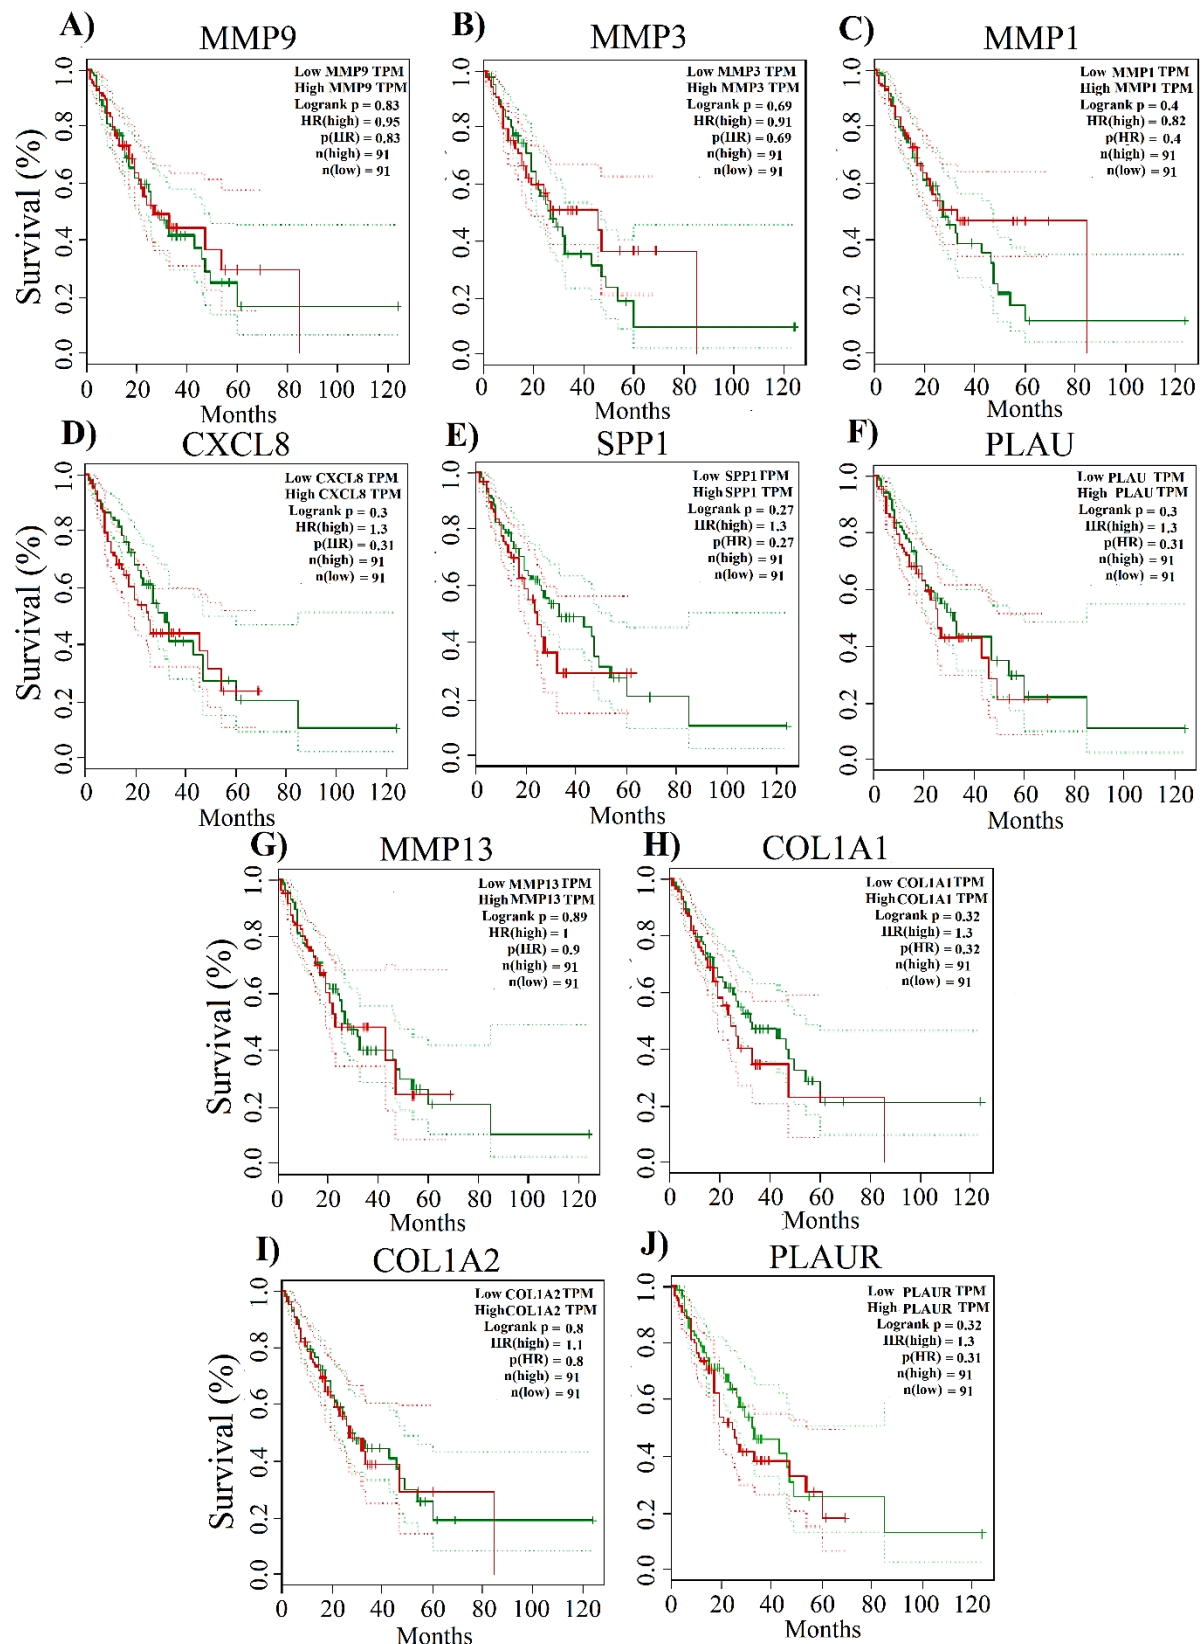

**Figure S1.** Kaplan-Meier analysis of the relationship between overall survival and HGsT10 expression using GEPIA analysis included 91 normal and 91 tumor samples. The green trend line indicated the lower expression of HGsT10 and increased survivability. The red trend line indicates the overexpression of HGsT10 and decreased survivability in ESCA samples.

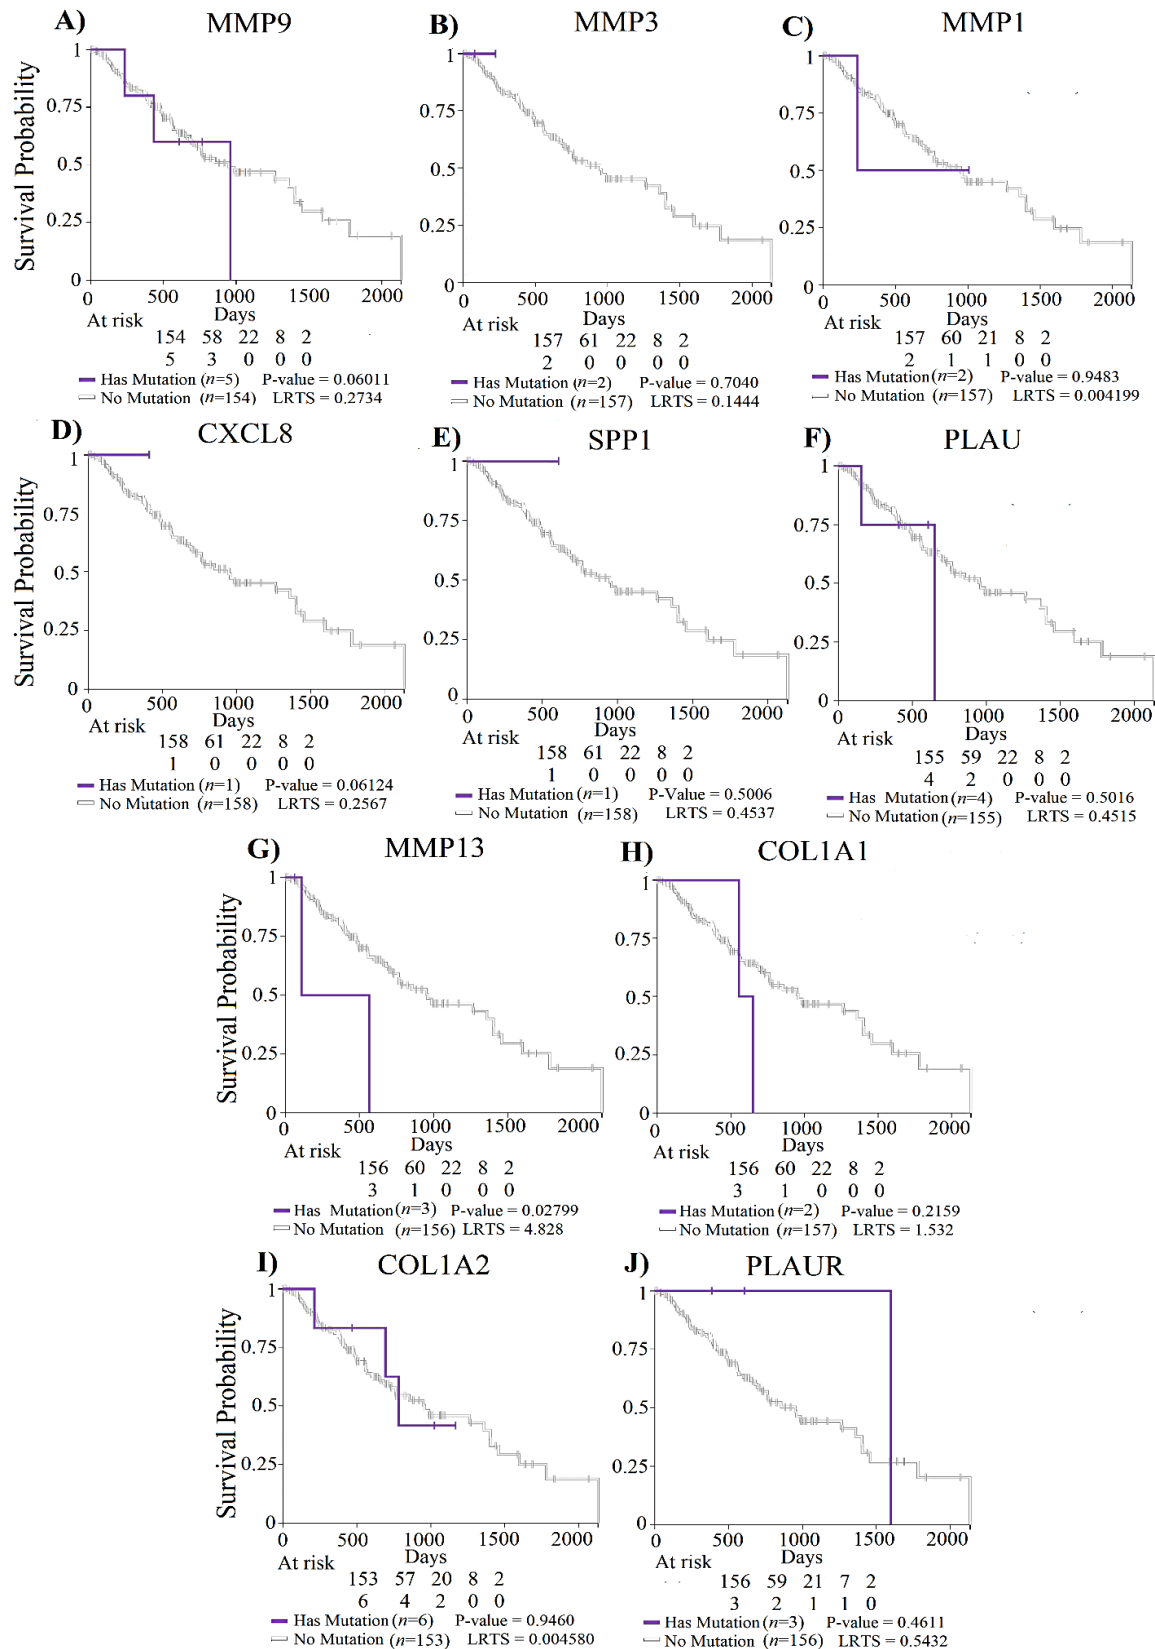

**Figure S2.** The identification of somatic mutation for the HGst10 and its co-relation with the overall survivability of the ESCA patients using the GDC TCGA dataset includes 160 samples. The Grey line indicates the overall survivability of the ESCA patients without the mutation. The blue line represents the overall survivability of the patients with mutations. Abbreviation: LRTS - Log-rank test statistics. The gene COL1A2 (I) and MMP9 (A) mutations were noted in 6 and 5 samples, respectively, with the decreased overall survivability.
