# Supplementary material
Source: MDPI journal article supplement (https://www.mdpi.com/2076-3417/12/3/1083)
Supplement: s1 [file s1]

Archive with 2 entries (2 files):
- applsci-1492795-supplementary/Supplementary File S1.xlsx
- applsci-1492795-supplementary/Supplementary File S2.pdf
