# Supplementary material
Source: MDPI journal article supplement (https://www.mdpi.com/2076-3417/12/3/1083)
Supplement: s1 [file s1 › applsci-1492795-supplementary/Supplementary File S1.xlsx]

## Sheet: Table S1_Top 250 genes_logFC
Table S1: The predicted top 250 DEGs of GSE161533 dataset from GEO Database
Gene symbol	adj.P.Val	P.Value	t	B	logFC
MMP1	8.03e-17	1.03e-20	-14.4758	36.7438	-6.77851
MMP12	3.04e-15	9.45e-19	-13.059	32.3489	-5.30399
SPP1	2.11e-14	2.12e-17	-12.1282	29.3133	-4.78451
MMP10	1.31e-14	1.1e-17	-12.3204	29.9495	-4.65764
MMP3	1.74e-14	1.58e-17	-12.2141	29.5983	-4.58994
CXCL8	4.6e-14	6.98e-17	-11.7801	28.1478	-4.25996
KRT17///JUP	2.72e-14	3.38e-17	-11.9909	28.8554	-4.1213
COL1A1	2.57e-13	7.06e-16	-11.1162	25.881	-4.09969
WDR72	6.11e-16	1.34e-19	-13.6612	34.2499	-3.69439
INHBA	4.87e-16	9.79e-20	-13.7596	34.5559	-3.66334
CTHRC1	9.71e-17	1.6e-20	-14.334	36.3161	-3.55193
KRT17///JUP	2.29e-14	2.44e-17	-12.0865	29.1746	-3.45796
WDR72	8.03e-17	9.58e-21	-14.4985	36.8118	-3.44801
WISP1	1.67e-19	3.06e-24	-17.2425	44.5687	-3.37911
MMP9	2.74e-13	7.73e-16	-11.0907	25.793	-3.29899
HOXD10	3.97e-14	5.88e-17	-11.83	28.3158	-3.22711
ADAM12	2.01e-14	1.91e-17	-12.1588	29.4148	-3.16425
INHBA	2.07e-14	2.01e-17	-12.1436	29.3643	-3.1515
PLA2G7	9.21e-14	1.77e-16	-11.5115	27.2377	-3.02062
WDR66	8.28e-14	1.48e-16	-11.5636	27.4149	-2.98471
ADAMTS2	2.22e-14	2.28e-17	-12.1071	29.243	-2.94775
MMP13	8.46e-13	3.27e-15	-10.6852	24.3792	-2.84978
CCL3L3	2.26e-14	2.36e-17	-12.0971	29.2097	-2.73903
ISG15	7.85e-13	2.95e-15	-10.7136	24.4788	-2.67141
CCL3L1	7.48e-15	5.12e-18	-12.5494	30.7013	-2.64702
LAMC2	7.85e-13	2.96e-15	-10.7132	24.4772	-2.62588
COL1A2	1.11e-14	8.31e-18	-12.4048	30.2276	-2.57714
PLAU	6.24e-17	4.56e-21	-14.739	37.5307	-2.54726
ADAM12	6.71e-14	1.14e-16	-11.6378	27.6669	-2.50825
TNFAIP6	1.01e-12	4.34e-15	-10.6063	24.1018	-2.46495
TNFAIP6	1.58e-13	3.52e-16	-11.3145	26.5641	-2.416
HOXB7	1.02e-13	2.03e-16	-11.4717	27.102	-2.34527
MFAP2	8.31e-14	1.5e-16	-11.5579	27.3956	-2.24717
TYMP	3.68e-13	1.15e-15	-10.9783	25.4031	-2.21559
LOXL2	1.31e-14	1.13e-17	-12.3139	29.9281	-2.19955
LOX	3.87e-13	1.23e-15	-10.959	25.336	-2.13814
C5AR1	1.51e-13	3.34e-16	-11.3292	26.6146	-2.13019
SNX10	3.87e-14	5.38e-17	-11.8557	28.4022	-2.08984
PLAUR	3.87e-14	5.45e-17	-11.8521	28.3903	-2.08379
ADAMTS12	5.84e-14	9.78e-17	-11.6822	27.8171	-2.02643
SOX4	9.4e-13	3.75e-15	-10.6468	24.2444	-1.99771
THY1	3.65e-13	1.13e-15	-10.9839	25.4224	-1.99257
FCGR3B	8.28e-13	3.17e-15	-10.6937	24.4088	-1.98379
HOXB7	2.01e-13	5.16e-16	-11.2054	26.1888	-1.97864
PMEPA1	1.81e-14	1.69e-17	-12.1951	29.5352	-1.95036
HOXA10	1.83e-13	4.46e-16	-11.2468	26.3316	-1.90603
BID	9.58e-17	1.4e-20	-14.3761	36.4432	-1.88175
PXDN	3.14e-15	1.07e-18	-13.0206	32.226	-1.7924
OLFML2B	1.2e-14	9.46e-18	-12.3664	30.1012	-1.75489
SOCS1	1.19e-12	5.44e-15	-10.5433	23.8795	-1.75339
MFHAS1	9.83e-13	4.06e-15	-10.6245	24.1656	-1.7501
COL4A1	3.14e-15	1.09e-18	-13.0148	32.2073	-1.72299
LOC101928195///LOC100996643///MTHFD1L	2.35e-14	2.71e-17	-12.0561	29.073	-1.72075
LOC101928615///FNDC3B	6.94e-13	2.5e-15	-10.7599	24.6412	-1.71018
PXDN	6.45e-15	3.54e-18	-12.6596	31.0606	-1.71006
BICD1	2.17e-13	5.75e-16	-11.1746	26.0826	-1.6725
TFRC	4.92e-14	7.65e-17	-11.7536	28.0584	-1.65661
UBE2C	5.86e-13	2.04e-15	-10.8176	24.8431	-1.64324
PLAUR	2.01e-13	5.19e-16	-11.2035	26.1822	-1.61064
CEBPB	9.99e-15	7.31e-18	-12.443	30.3529	-1.5849
MEST	4.09e-13	1.33e-15	-10.9369	25.2592	-1.57037
CDC25B	4.01e-13	1.28e-15	-10.9477	25.2967	-1.56072
UHRF1	5.33e-13	1.83e-15	-10.8471	24.946	-1.54858
BID	1.59e-13	3.57e-16	-11.3104	26.5499	-1.53987
GINS1	2.17e-13	5.78e-16	-11.1729	26.0769	-1.506
NCF2	3.44e-14	4.53e-17	-11.9059	28.571	-1.50204
COL4A1	1.06e-13	2.18e-16	-11.452	27.0349	-1.49376
PLXNA1	6.2e-15	3.06e-18	-12.7031	31.2021	-1.49253
P3H4	7.16e-15	4.31e-18	-12.6004	30.8678	-1.48993
LOC101928615///FNDC3B	3.59e-13	1.1e-15	-10.9905	25.4455	-1.48329
C4orf48	1.06e-13	2.16e-16	-11.4545	27.0434	-1.42026
STC2	3.89e-14	5.55e-17	-11.8465	28.3715	-1.34536
WISP1	2.66e-14	3.21e-17	-12.0064	28.9073	-1.33155
HOMER3	4.04e-13	1.3e-15	-10.9438	25.2831	-1.31393
MMP19	1.12e-12	4.87e-15	-10.5737	23.9869	-1.30371
MRGBP	2.62e-14	3.09e-17	-12.018	28.9459	-1.28588
EXT1	9.41e-13	3.77e-15	-10.6454	24.2394	-1.28492
LRRC8D	5.15e-14	8.25e-17	-11.7316	27.9843	-1.24308
SLC25A32	7.09e-13	2.58e-15	-10.7511	24.6102	-1.22573
ASXL1	1.19e-12	5.43e-15	-10.5439	23.8817	-1.22273
CDCA5	3.52e-13	1.07e-15	-10.9976	25.4701	-1.15087
APMAP	1.25e-15	3.21e-19	-13.3907	33.4021	-1.08267
USB1	2.1e-13	5.53e-16	-11.1856	26.1207	-1.07062
E2F3	5.04e-14	7.92e-17	-11.7433	28.0239	-1.06576
P3H1	4.88e-14	7.5e-17	-11.7593	28.0777	-1.06049
LIMK1	3.87e-14	5.31e-17	-11.8593	28.4146	-1.03082
TMEM184B	1.78e-13	4.13e-16	-11.2686	26.4063	-1.02839
PNPT1	2.01e-13	5.16e-16	-11.2054	26.1887	-1.02173
CHPF2	2.57e-13	7.03e-16	-11.1175	25.8855	-1.01963
DERL1	8.8e-14	1.66e-16	-11.5302	27.3014	-0.99768
AGRN	1.19e-12	5.41e-15	-10.5449	23.8854	-0.98802
KIAA0930	3.17e-13	9.17e-16	-11.0423	25.6252	-0.96338
SLC39A6	1.95e-13	4.84e-16	-11.2237	26.2519	-0.95331
RCC2	3.43e-14	4.39e-17	-11.9148	28.6007	-0.93606
CHPF2	9.87e-13	4.12e-15	-10.6203	24.151	-0.93587
TCF3	3.51e-13	1.06e-15	-11.0015	25.4835	-0.90894
LOC101927826///FBXO41	6.8e-14	1.18e-16	-11.6276	27.6322	-0.89118
MTERF3	9.87e-13	4.13e-15	-10.6197	24.1488	-0.88959
DTYMK	6.94e-13	2.51e-15	-10.7588	24.6373	-0.86495
ATP2C1	3.2e-13	9.43e-16	-11.0345	25.5982	-0.86215
NUP62	9.52e-13	3.88e-15	-10.637	24.2098	-0.8477
H2AFV	8.46e-13	3.28e-15	-10.6842	24.3756	-0.83785
DTYMK	1.96e-13	4.91e-16	-11.2194	26.2371	-0.83384
GTF2E1	9.63e-13	3.94e-15	-10.6327	24.1945	-0.81276
CTSB	2.11e-14	2.12e-17	-12.1282	29.3133	-0.79735
TGIF2	9.9e-13	4.18e-15	-10.6164	24.1372	-0.79617
HOXA10	8.18e-13	3.11e-15	-10.6989	24.4273	-0.72852
RPN2	4.06e-13	1.31e-15	-10.9407	25.2721	-0.71432
RPN2	1.78e-13	4.17e-16	-11.2662	26.3982	-0.71063
DDX27///SS18	3.3e-13	9.77e-16	-11.0245	25.5633	-0.69126
DDX27	1.07e-13	2.24e-16	-11.4436	27.0061	-0.68656
AMPD2	9.79e-13	4.03e-15	-10.6269	24.1742	-0.66733
PCNX1	8.28e-13	3.18e-15	-10.6927	24.4053	-0.58866
PRKAR2A	6.74e-14	1.16e-16	11.6334	27.6519	0.588018
SLC35C1	1.07e-12	4.64e-15	10.5872	24.0343	0.623318
PIAS1	1.66e-13	3.75e-16	11.2959	26.5002	0.744926
ACAA1	8.64e-14	1.61e-16	11.5383	27.3289	0.811932
PATJ	3.18e-13	9.25e-16	11.0399	25.6167	0.829359
RAB11A	6.88e-13	2.44e-15	10.7668	24.6653	0.853343
TAX1BP1	2.58e-13	7.13e-16	11.1134	25.8714	0.856225
ZNF677	7.23e-15	4.63e-18	12.5795	30.7996	0.87632
BBIP1	5.39e-14	8.87e-17	11.7106	27.9131	0.881501
ABCD3	4.27e-13	1.41e-15	10.9215	25.2055	0.891057
HSDL2	8.18e-13	3.11e-15	10.6987	24.4266	0.932551
RSPH3	2.29e-14	2.55e-17	12.0734	29.1309	0.966112
HIGD1A	6.45e-15	3.33e-18	12.6777	31.1195	0.967336
SNORA68	6.94e-13	2.49e-15	10.7613	24.6458	0.96995
UNC13B	3.96e-14	5.72e-17	11.838	28.3427	0.973849
HEBP2	9.45e-13	3.82e-15	10.6416	24.226	0.983948
SERPINB6	2.18e-13	5.85e-16	11.1698	26.066	1.01796
FAM63A	1.31e-14	1.1e-17	12.3229	29.9579	1.02077
ARHGAP27	1.19e-12	5.27e-15	10.5518	23.9096	1.02634
SUCLG2	1.06e-13	2.19e-16	11.45	27.0279	1.04
SUCLG2	3.97e-14	5.81e-17	11.8333	28.327	1.04051
PDCD4	7.48e-15	5.2e-18	12.5446	30.6858	1.04644
BBIP1	1.35e-13	2.92e-16	11.368	26.7476	1.05795
FYCO1	2.29e-14	2.52e-17	12.0779	29.1457	1.06265
C1orf21	9.9e-13	4.17e-15	10.6172	24.14	1.08973
FXYD1	6.7e-13	2.37e-15	10.7757	24.6963	1.09663
HIGD1A	9.32e-14	1.81e-16	11.5052	27.2161	1.09726
MIR4680	5.15e-14	8.29e-17	11.7302	27.9796	1.09931
RASAL1	2.04e-13	5.29e-16	11.1985	26.1653	1.10116
MIR4680///PDCD4	1.01e-12	4.27e-15	10.6103	24.1157	1.10225
LOC101929340	2.29e-14	2.56e-17	12.0727	29.1283	1.12336
CRYL1	1.2e-14	9.36e-18	12.3697	30.1119	1.13295
SNX9	7.5e-13	2.76e-15	10.7328	24.5462	1.17448
AGFG2	9.87e-13	4.12e-15	10.6204	24.1515	1.1964
CCNG2	7.18e-15	4.46e-18	12.5903	30.8348	1.20846
ZNF823	8.51e-14	1.56e-16	11.5467	27.3575	1.21426
AR	5.76e-13	1.99e-15	10.824	24.8653	1.23758
CEACAM1	8.88e-14	1.69e-16	11.5247	27.2826	1.24303
	9.67e-14	1.89e-16	11.492	27.1713	1.24765
	3.44e-14	4.48e-17	11.9092	28.5819	1.24954
C4orf3	5.18e-13	1.76e-15	10.8581	24.9844	1.26349
THRB	1.19e-12	5.43e-15	10.5436	23.8805	1.28013
UBL3	1.74e-14	1.59e-17	12.2129	29.5942	1.28229
RAB11A	5.05e-13	1.71e-15	10.8669	25.0153	1.28431
ETFDH	8.98e-13	3.53e-15	10.6636	24.3031	1.29995
SORT1	1.83e-13	4.41e-16	11.2503	26.3435	1.30094
ETFDH	8.97e-13	3.51e-15	10.6652	24.309	1.31057
PLEKHA7	8.51e-14	1.57e-16	11.5452	27.3524	1.31432
MYO6	4.11e-13	1.35e-15	10.9342	25.2496	1.31672
GAB1	9.01e-13	3.56e-15	10.6614	24.2957	1.33617
SMIM5	4.82e-13	1.6e-15	10.8846	25.0767	1.33773
ABLIM3	1.83e-13	4.42e-16	11.2497	26.3413	1.34006
FUT6	1.14e-12	5e-15	10.5667	23.9623	1.35609
FBXO3	1.19e-12	5.28e-15	10.5513	23.908	1.35654
USP6NL	3.52e-13	1.07e-15	10.9986	25.4735	1.35701
BSPRY	5.05e-13	1.71e-15	10.8667	25.0145	1.37663
EPHX2	5.01e-13	1.68e-15	10.8725	25.0345	1.37879
CPEB3	2.7e-14	3.31e-17	11.9971	28.8763	1.38246
PCBP1-AS1	7.16e-15	4.32e-18	12.5997	30.8656	1.38346
DOPEY2	3.2e-13	9.4e-16	11.0353	25.601	1.38463
FAM214A	2.83e-13	8.01e-16	11.0806	25.758	1.40895
ZNF662	3.36e-14	4.23e-17	11.9254	28.6363	1.41354
TMOD3	1.08e-13	2.3e-16	11.4363	26.9811	1.4344
AIM1	1.13e-12	4.95e-15	10.5697	23.9728	1.48563
RAB11FIP1	7.68e-13	2.84e-15	10.7247	24.5176	1.49643
UBL3	1.29e-14	1.04e-17	12.3391	30.0111	1.51781
KAT2B	3.37e-13	1.01e-15	11.0164	25.5354	1.51907
LPIN1	7.75e-13	2.89e-15	10.7195	24.4994	1.52472
LOC101927157///NIPAL1	1.83e-13	4.49e-16	11.245	26.3254	1.54723
SMAGP	3.38e-15	1.31e-18	12.9586	32.027	1.56753
CAB39L	2.62e-14	3.12e-17	12.015	28.9361	1.59234
NUCB2	9.87e-14	1.95e-16	11.4833	27.1416	1.60868
SPAG16	9.03e-13	3.59e-15	10.6593	24.2882	1.60943
LOC101928274///VSIG10	6.45e-15	3.51e-18	12.6625	31.07	1.61172
RAB11A	5.5e-15	2.51e-18	12.7627	31.3953	1.62039
ERBB3	1.5e-13	3.3e-16	11.3325	26.626	1.65916
BLNK	3.38e-15	1.36e-18	12.9479	31.9926	1.6657
SASH1	1.78e-13	4.1e-16	11.271	26.4148	1.6669
CAB39L	1.01e-12	4.32e-15	10.6074	24.1057	1.71222
OBFC1	3.22e-15	1.18e-18	12.9919	32.1338	1.71749
	9.41e-13	3.79e-15	10.644	24.2344	1.73788
C1orf116	7.16e-15	4.19e-18	12.6094	30.8973	1.77243
LAMB4	8.58e-13	3.34e-15	10.6788	24.3565	1.81496
SERPINB1	1.83e-13	4.5e-16	11.2445	26.3236	1.85158
LGI1	1.22e-13	2.61e-16	11.3998	26.8565	1.89902
EPS8L1	2.52e-13	6.83e-16	11.1259	25.9145	1.94027
GPX3	5.28e-13	1.8e-15	10.8515	24.9615	1.94275
PTK6	1.78e-13	4.06e-16	11.2737	26.4241	1.95249
EPS8L1	2e-13	5.05e-16	11.2115	26.2099	1.98418
LEXM	1.03e-13	2.06e-16	11.4672	27.0865	1.9928
DPT	1.48e-13	3.22e-16	11.3398	26.651	2.00025
SERPINB1	3.51e-13	1.06e-15	11.0026	25.4874	2.00164
TMPRSS2	1.83e-13	4.38e-16	11.252	26.3494	2.01191
LOC101930349///LOC101930344///CGNL1	4.76e-13	1.58e-15	10.8897	25.0946	2.0216
PAQR8	3.81e-13	1.21e-15	10.9648	25.3562	2.02781
EPS8L1	3.04e-13	8.74e-16	11.056	25.6726	2.03441
FHL1	8.28e-14	1.48e-16	11.5619	27.4093	2.0379
ANGPTL1	2.08e-13	5.44e-16	11.1903	26.1368	2.05682
FLG-AS1	6.13e-13	2.14e-15	10.8036	24.7942	2.06739
ACPP	7.75e-13	2.89e-15	10.7198	24.5006	2.07715
SHROOM3	3.33e-18	1.22e-22	15.9488	41.0306	2.08463
TFAP2B	5.33e-14	8.68e-17	11.7167	27.9338	2.08895
CCNG2	1.19e-12	5.44e-15	10.5431	23.879	2.09448
SERPINB1	1.04e-12	4.47e-15	10.5976	24.0711	2.096
SLC44A3	5.24e-15	2.3e-18	12.7891	31.4808	2.13782
SASH1	1.08e-13	2.26e-16	11.4406	26.9958	2.15648
C1orf116	1.82e-15	5e-19	13.2539	32.9694	2.1732
GDPD3	2.69e-15	7.88e-19	13.1144	32.5259	2.21795
LNX1	2.68e-13	7.46e-16	11.1008	25.8279	2.23022
EPS8L1	3.79e-13	1.19e-15	10.9679	25.3668	2.27416
C1orf116	2.3e-14	2.61e-17	12.0673	29.1104	2.28872
CYP2C18	1.19e-12	5.43e-15	10.5435	23.8803	2.28972
SHROOM3	2.46e-16	4.49e-20	14.0048	35.3128	2.31099
LOC441178	2.68e-13	7.49e-16	11.0994	25.8231	2.34376
PRSS3	9.46e-13	3.84e-15	10.6401	24.2205	2.35808
SAMD5	4.11e-15	1.73e-18	12.8758	31.7607	2.37342
RERGL	2.87e-13	8.2e-16	11.0739	25.7348	2.38441
ANKRD20A5P	4.26e-14	6.39e-17	11.8055	28.2336	2.41158
LMO7	7.48e-15	5.06e-18	12.5527	30.7121	2.41272
LOC441178	3.65e-13	1.14e-15	10.982	25.4159	2.43213
MYOC	3.66e-14	4.89e-17	11.8833	28.4951	2.44365
HPGD	6.94e-13	2.5e-15	10.7601	24.6417	2.47082
PRKAA2	1.19e-12	5.24e-15	10.5536	23.9161	2.48132
SH3BGRL2	1.18e-15	2.79e-19	13.4331	33.5357	2.49587
ANKRD20A11P	1.85e-13	4.57e-16	11.2398	26.3074	2.56193
MYZAP	8.03e-17	1.01e-20	14.4808	36.7589	2.59372
FAM3D	3.87e-14	5.42e-17	11.8533	28.3941	2.59632
AIF1L	7.32e-13	2.68e-15	10.7411	24.5751	2.64583
IL18	6.56e-13	2.3e-15	10.783	24.7221	2.95497
SORBS2	1.01e-12	4.35e-15	10.6056	24.0993	3.09725
PPP1R3C	1.65e-14	1.45e-17	12.2408	29.6865	3.10026
HPGD	5.84e-14	9.83e-17	11.6808	27.8126	3.11137
SCIN	9.31e-15	6.64e-18	12.4715	30.4463	3.30404
LOC100507221	7.87e-14	1.38e-16	11.5823	27.4787	3.30957
GYS2	5.8e-15	2.76e-18	12.7348	31.305	3.56757
SFTA2	1.05e-17	5.74e-22	15.424	39.5356	4.23857
218180_s_at	1.19e-12	5.45e-15	10.5426	23.8773	1.51588

## Sheet: Table S2_Down regulated genes
Table S2: The predicted down regulated genes from the top 250 DEGs of GSE161533 dataset from GEO Database
Gene Name	Down Regulated Genes logFC < 0
MMP1	-6.77851
MMP12	-5.30399
SPP1	-4.78451
MMP10	-4.65764
MMP3	-4.58994
CXCL8	-4.25996
KRT17///JUP	-4.1213
COL1A1	-4.09969
WDR72	-3.69439
INHBA	-3.66334
CTHRC1	-3.55193
KRT17///JUP	-3.45796
WDR72	-3.44801
WISP1	-3.37911
MMP9	-3.29899
HOXD10	-3.22711
ADAM12	-3.16425
INHBA	-3.1515
PLA2G7	-3.02062
WDR66	-2.98471
ADAMTS2	-2.94775
MMP13	-2.84978
CCL3L3	-2.73903
ISG15	-2.67141
CCL3L1	-2.64702
LAMC2	-2.62588
COL1A2	-2.57714
PLAU	-2.54726
ADAM12	-2.50825
TNFAIP6	-2.46495
TNFAIP6	-2.416
HOXB7	-2.34527
MFAP2	-2.24717
TYMP	-2.21559
LOXL2	-2.19955
LOX	-2.13814
C5AR1	-2.13019
SNX10	-2.08984
PLAUR	-2.08379
ADAMTS12	-2.02643
SOX4	-1.99771
THY1	-1.99257
FCGR3B	-1.98379
HOXB7	-1.97864
PMEPA1	-1.95036
HOXA10	-1.90603
BID	-1.88175
PXDN	-1.7924
OLFML2B	-1.75489
SOCS1	-1.75339
MFHAS1	-1.7501
COL4A1	-1.72299
LOC101928195///LOC100996643///MTHFD1L	-1.72075
LOC101928615///FNDC3B	-1.71018
PXDN	-1.71006
BICD1	-1.6725
TFRC	-1.65661
UBE2C	-1.64324
PLAUR	-1.61064
CEBPB	-1.5849
MEST	-1.57037
CDC25B	-1.56072
UHRF1	-1.54858
BID	-1.53987
GINS1	-1.506
NCF2	-1.50204
COL4A1	-1.49376
PLXNA1	-1.49253
P3H4	-1.48993
LOC101928615///FNDC3B	-1.48329
C4orf48	-1.42026
STC2	-1.34536
WISP1	-1.33155
HOMER3	-1.31393
MMP19	-1.30371
MRGBP	-1.28588
EXT1	-1.28492
LRRC8D	-1.24308
SLC25A32	-1.22573
ASXL1	-1.22273
CDCA5	-1.15087
APMAP	-1.08267
USB1	-1.07062
E2F3	-1.06576
P3H1	-1.06049
LIMK1	-1.03082
TMEM184B	-1.02839
PNPT1	-1.02173
CHPF2	-1.01963
DERL1	-0.99768
AGRN	-0.98802
KIAA0930	-0.96338
SLC39A6	-0.95331
RCC2	-0.93606
CHPF2	-0.93587
TCF3	-0.90894
LOC101927826///FBXO41	-0.89118
MTERF3	-0.88959
DTYMK	-0.86495
ATP2C1	-0.86215
NUP62	-0.8477
H2AFV	-0.83785
DTYMK	-0.83384
GTF2E1	-0.81276
CTSB	-0.79735
TGIF2	-0.79617
HOXA10	-0.72852
RPN2	-0.71432
RPN2	-0.71063
DDX27///SS18	-0.69126
DDX27	-0.68656
AMPD2	-0.66733
PCNX1	-0.58866

## Sheet: Table S3_Upregulated Genes
Table S3: The predicted up regulated genes from the top 250 DEGs of GSE161533 dataset from GEO Database
Gene Name	Up Regulated Genes logFC > 0
PRKAR2A	0.588018
SLC35C1	0.623318
PIAS1	0.744926
ACAA1	0.811932
PATJ	0.829359
RAB11A	0.853343
TAX1BP1	0.856225
ZNF677	0.87632
BBIP1	0.881501
ABCD3	0.891057
HSDL2	0.932551
RSPH3	0.966112
HIGD1A	0.967336
SNORA68	0.96995
UNC13B	0.973849
HEBP2	0.983948
SERPINB6	1.01796
FAM63A	1.02077
ARHGAP27	1.02634
SUCLG2	1.04
SUCLG2	1.04051
PDCD4	1.04644
BBIP1	1.05795
FYCO1	1.06265
C1orf21	1.08973
FXYD1	1.09663
HIGD1A	1.09726
MIR4680	1.09931
RASAL1	1.10116
MIR4680///PDCD4	1.10225
LOC101929340	1.12336
CRYL1	1.13295
SNX9	1.17448
AGFG2	1.1964
CCNG2	1.20846
ZNF823	1.21426
AR	1.23758
CEACAM1	1.24303
	1.24765
	1.24954
C4orf3	1.26349
THRB	1.28013
UBL3	1.28229
RAB11A	1.28431
ETFDH	1.29995
SORT1	1.30094
ETFDH	1.31057
PLEKHA7	1.31432
MYO6	1.31672
GAB1	1.33617
SMIM5	1.33773
ABLIM3	1.34006
FUT6	1.35609
FBXO3	1.35654
USP6NL	1.35701
BSPRY	1.37663
EPHX2	1.37879
CPEB3	1.38246
PCBP1-AS1	1.38346
DOPEY2	1.38463
FAM214A	1.40895
ZNF662	1.41354
TMOD3	1.4344
AIM1	1.48563
RAB11FIP1	1.49643
UBL3	1.51781
KAT2B	1.51907
LPIN1	1.52472
LOC101927157///NIPAL1	1.54723
SMAGP	1.56753
CAB39L	1.59234
NUCB2	1.60868
SPAG16	1.60943
LOC101928274///VSIG10	1.61172
RAB11A	1.62039
ERBB3	1.65916
BLNK	1.6657
SASH1	1.6669
CAB39L	1.71222
OBFC1	1.71749
	1.73788
C1orf116	1.77243
LAMB4	1.81496
SERPINB1	1.85158
LGI1	1.89902
EPS8L1	1.94027
GPX3	1.94275
PTK6	1.95249
EPS8L1	1.98418
LEXM	1.9928
DPT	2.00025
SERPINB1	2.00164
TMPRSS2	2.01191
LOC101930349///LOC101930344///CGNL1	2.0216
PAQR8	2.02781
EPS8L1	2.03441
FHL1	2.0379
ANGPTL1	2.05682
FLG-AS1	2.06739
ACPP	2.07715
SHROOM3	2.08463
TFAP2B	2.08895
CCNG2	2.09448
SERPINB1	2.096
SLC44A3	2.13782
SASH1	2.15648
C1orf116	2.1732
GDPD3	2.21795
LNX1	2.23022
EPS8L1	2.27416
C1orf116	2.28872
CYP2C18	2.28972
SHROOM3	2.31099
LOC441178	2.34376
PRSS3	2.35808
SAMD5	2.37342
RERGL	2.38441
ANKRD20A5P	2.41158
LMO7	2.41272
LOC441178	2.43213
MYOC	2.44365
HPGD	2.47082
PRKAA2	2.48132
SH3BGRL2	2.49587
ANKRD20A11P	2.56193
MYZAP	2.59372
FAM3D	2.59632
AIF1L	2.64583
IL18	2.95497
SORBS2	3.09725
PPP1R3C	3.10026
HPGD	3.11137
SCIN	3.30404
LOC100507221	3.30957
GYS2	3.56757
SFTA2	4.23857
218180_s_at	1.51588

## Sheet: Table S4_Enrichment analysis
Table S4: FDR values for the enriched pathway terms
Gene Set	Description	Size	Expect	Ratio	P Value	FDR
hsa04657	IL-17 signaling pathway	93	0.13167	37.973	8.4985e-08	2.7535e-05
hsa04926	Relaxin signaling pathway	130	0.18406	27.165	4.5785e-07	7.4171e-05
hsa05219	Bladder cancer	40	0.056633	52.972	1.9649e-05	0.0021221
hsa05202	Transcriptional misregulation in cancer	177	0.2506	15.962	7.1154e-05	0.0057635
hsa04512	ECM-receptor interaction	79	0.11185	26.822	0.00015276	0.0098986
hsa05323	Rheumatoid arthritis	87	0.12318	24.355	0.00020353	0.010116
hsa05146	Amoebiasis	92	0.13026	23.032	0.00024023	0.010116
hsa05215	Prostate cancer	95	0.1345	22.304	0.00026419	0.010116
hsa04933	AGE-RAGE signaling pathway in diabetic complications	97	0.13734	21.844	0.000281	0.010116
hsa04510	Focal adhesion	193	0.27325	10.979	0.0020919	0.061616

## Sheet: Table S5_Kegg Path Annotation
Table S5 : The annotaed GO function, Process and KEGG Pathway
Hug Genes	Enzyme	EC Number	GO: Function	GO: Process	Hub Genes involved in other Cancer and viral Pathway
MMP9	Matrix metalloproteinase-9	3.4.24.35	Protein binding| metalloendopeptidase Activity	Positive regulation of cell proliferation and related signaling pathway|DNA binding|negatice redulation of apoptotic signaling pathway	1. Transcriptional misregulation in cancer
					2. Proteoglycans in cancer
					3. MicroRNAs in cancer
					4. Prostate cancer
					5. Bladder cancer
MMP3	Matrix metallopeptidase 3	3.4.24.17	Ion and Protein binding|metalloendopeptidase activity	Cellular response to nitric oxide|collagen catabolic process|extracellular matrix disassembly|negative regulation of hydrogen peroxide metabolic process|positive regulation of oxidative stress-induced cell death, protein oligomerization|Proteolysis	1. Coronavirus disease - COVID-19
					2. Transcriptional misregulation in cancer
					3. Prostate cancer
MMP1	Matrix metallopeptidase 1	3.4.24.7	Ion and Protein binding|metalloendopeptidase activity	Cellular protein metabolic process|collagen catabolic process|extracellular matrix disassembly|leukocyte migration|positive regulation of protein oligomerization| proteolysis|viral process	1. Coronavirus disease - COVID-19
					2. Pathways in cancer
					3. Bladder cancer
CXCL8	C-X-C motif chemokine ligand 8	-	Chemokine activity|interleukin-8 receptor and protein binding	PERK-mediated unfolded protein response|calcium-mediated signaling|cell cycle arrest|cellular response to fibroblast growth factor stimulus, interleukin-1, lipopolysaccharide, tumor necrosis factor|chemokine-mediated signaling pathway|chemotaxis|embryonic digestive tract development|immune response|inflammatory response|movement of cell or subcellular component|negative regulation of G-protein co…	1. Kaposi sarcoma-associated herpesvirus infection
					2. Coronavirus disease - COVID-19
					3. Pathways in cancer
					4. Transcriptional misregulation in cancer
					5. Bladder cancer
SPP1	Secreted phosphoprotein 1	-	Cytokine activity|extracellular matrix binding|protein binding	Biomineral tissue development|cell adhesion|decidualization|embryo implantation|extracellular matrix organization|inflammatory response|negative regulation of collateral sprouting of intact axon in response to injury|osteoblast differentiation|positive regulation of bone resorption|response to steroid hormone and vitamin D	1. Human papillomavirus infection
PLAU	Urokinase plasminogen activator	3.4.21.73	Protein binding|serine-type endopeptidase activity	Angiogenesis|cellular response to fluid shear stress, glucose stimulus, hepatocyte growth factor stimulus, hypoxia, lipopolysaccharide, staurosporine| chemotaxis|embryo implantation| fibrinolysis|neuron death|positive regulation of cell migration, cell proliferation, ovulation, reactive oxygen species metabolic process, smooth muscle cell migration|regulation of cell adhesion mediated by integrin…	-
MMP13	Matrix metallopeptidase 13	3.4.24.-	Calcium and its dependent protien ion binding| collagen binding| fibronectin binding| low-density lipoprotein particle receptor binding| metalloendopeptidase activity	Bone mineralization, morphogenesis|cellular protein metabolic process|collagen catabolic process|embryonic hindlimb morphogenesis|endochondral ossification| estrous cycle| extracellular matrix disassembly| growth plate cartilage development|heart development|luteolysis osteoblast differentiation|parturition|response to drug, estrogen, hypoxia and mechanical stimulus	-
COL1A1	Collagen type I alpha 1 chain	-	Extracellular matrix structural constituent| identical protein binding| metal ion binding| platelet-derived growth factor binding	Blood vessel development|bone morphogenesis|Cellular response to epidermal growth factor stimulus, fibroblast growth factor stimulus, fluoride, mechanical stimulus, retinoic acid, transforming growth factor beta stimulus, tumor necrosis factor|intramembranous ossification|leukocyte migration|negative regulation of cell-substrate adhesion|osteoblast differentiation|platelet activation|positive reg…	1. Human papillomavirus infection
COL1A2	Collagen type I alpha 2 chain	-	SMAD binding|extracellular matrix structural constituent|metal ion binding|platelet-derived growth factor binding|protein binding	Rho protein signal transduction|blood vessel development|cellular response to amino acid stimulus|leukocyte migration|odontogenesis|platelet activation|regulation of blood pressure and immune response|skin morphogenesis|transforming growth factor beta receptor signaling pathway	1. Human papillomavirus infection
					2. Proteoglycans in cancer
PLAUR	Plasminogen activator, urokinase receptor	-	Enzyme binding|receptor binding|urokinase plasminogen activator receptor activity	Attachment of GPI anchor to protein|blood coagulation|movement of cell or subcellular component|negative regulation of apoptotic process, cysteine-type endopeptidase activity involved in apoptotic signaling pathway, intrinsic apoptotic signaling pathway|positive regulation of DNA binding, epidermal growth factor receptor signaling pathway, protein phosphorylation, release of cytochrome c from mit…	-

## Sheet: String 
#node1	node2	node1_string_id	node2_string_id	neighborhood_on_chromosome	gene_fusion	phylogenetic_cooccurrence	homology	coexpression	experimentally_determined_interaction	database_annotated	automated_textmining	combined_score
ABCD3	ACAA1	9606.ENSP00000359233	9606.ENSP00000333664	0	0	0	0	0.092	0	0	0.461	0.49
ACAA1	CRYL1	9606.ENSP00000333664	9606.ENSP00000298248	0.093	0	0	0	0.187	0.35	0	0.221	0.577
ACAA1	HSDL2	9606.ENSP00000333664	9606.ENSP00000381785	0.046	0	0	0	0.151	0	0	0.408	0.478
ACAA1	SUCLG2	9606.ENSP00000333664	9606.ENSP00000419325	0.046	0	0	0	0.086	0	0.8	0.185	0.838
ACPP	TMPRSS2	9606.ENSP00000323036	9606.ENSP00000381588	0	0	0	0	0.061	0	0	0.397	0.409
ACPP	PMEPA1	9606.ENSP00000323036	9606.ENSP00000345826	0	0	0	0	0	0	0	0.469	0.469
ADAM12	COL1A1	9606.ENSP00000357668	9606.ENSP00000225964	0	0	0	0	0.181	0	0	0.309	0.41
ADAM12	COL1A2	9606.ENSP00000357668	9606.ENSP00000297268	0	0	0	0	0.152	0	0	0.35	0.425
ADAM12	MMP3	9606.ENSP00000357668	9606.ENSP00000299855	0	0	0	0	0.098	0	0	0.38	0.417
ADAM12	MMP9	9606.ENSP00000357668	9606.ENSP00000361405	0	0	0	0	0	0	0	0.431	0.431
ADAM12	LGI1	9606.ENSP00000357668	9606.ENSP00000360472	0	0	0	0	0.054	0.071	0	0.473	0.498
ADAMTS12	ADAMTS2	9606.ENSP00000422554	9606.ENSP00000251582	0	0	0	0.728	0.11	0	0.9	0.646	0.923
ADAMTS12	CTHRC1	9606.ENSP00000422554	9606.ENSP00000330523	0	0	0	0	0.123	0	0	0.389	0.441
ADAMTS12	COL4A1	9606.ENSP00000422554	9606.ENSP00000364979	0	0	0	0	0.307	0.064	0	0.194	0.432
ADAMTS2	COL1A1	9606.ENSP00000251582	9606.ENSP00000225964	0	0	0	0	0.33	0.064	0.9	0.521	0.966
ADAMTS2	LOX	9606.ENSP00000251582	9606.ENSP00000231004	0	0	0	0	0.172	0	0	0.474	0.546
ADAMTS2	LEPRE1	9606.ENSP00000251582	9606.ENSP00000236040	0	0	0	0	0.062	0	0	0.657	0.665
ADAMTS2	COL4A1	9606.ENSP00000251582	9606.ENSP00000364979	0	0	0	0	0.119	0.064	0	0.338	0.407
ADAMTS2	COL1A2	9606.ENSP00000251582	9606.ENSP00000297268	0	0	0	0	0.304	0.064	0.9	0.543	0.966
AGRN	LAMC2	9606.ENSP00000368678	9606.ENSP00000264144	0	0	0	0.542	0	0.136	0.9	0.142	0.914
AGRN	ERBB3	9606.ENSP00000368678	9606.ENSP00000267101	0	0	0	0	0.064	0.262	0	0.238	0.427
AGRN	EXT1	9606.ENSP00000368678	9606.ENSP00000367446	0	0	0	0	0.07	0	0.9	0.422	0.941
AGRN	PLXNA1	9606.ENSP00000368678	9606.ENSP00000377061	0	0	0	0	0.17	0.124	0	0.286	0.435
AR	CDC25B	9606.ENSP00000363822	9606.ENSP00000245960	0	0	0	0	0	0.379	0	0.187	0.473
AR	PIAS1	9606.ENSP00000363822	9606.ENSP00000249636	0	0	0	0	0	0.424	0.9	0.461	0.966
AR	E2F3	9606.ENSP00000363822	9606.ENSP00000262904	0	0	0	0	0	0	0	0.555	0.555
AR	KAT2B	9606.ENSP00000363822	9606.ENSP00000263754	0	0	0	0	0	0.478	0.9	0.43	0.967
AR	ERBB3	9606.ENSP00000363822	9606.ENSP00000267101	0	0	0	0	0.062	0.338	0	0.682	0.785
AR	CEBPB	9606.ENSP00000363822	9606.ENSP00000305422	0	0	0	0	0	0.344	0	0.607	0.731
AR	CXCL8	9606.ENSP00000363822	9606.ENSP00000306512	0	0	0	0	0	0	0	0.638	0.638
AR	H2AFV	9606.ENSP00000363822	9606.ENSP00000308405	0	0	0	0	0	0	0.9	0.23	0.919
AR	MMP1	9606.ENSP00000363822	9606.ENSP00000322788	0	0	0	0	0.061	0	0	0.499	0.509
AR	PMEPA1	9606.ENSP00000363822	9606.ENSP00000345826	0	0	0	0	0	0.379	0	0.695	0.802
AR	UBE2C	9606.ENSP00000363822	9606.ENSP00000348838	0	0	0	0	0.062	0.091	0	0.556	0.588
AR	MMP9	9606.ENSP00000363822	9606.ENSP00000361405	0	0	0	0	0	0	0	0.716	0.717
AR	ASXL1	9606.ENSP00000363822	9606.ENSP00000364839	0	0	0	0	0	0.36	0	0.164	0.442
AR	TMPRSS2	9606.ENSP00000363822	9606.ENSP00000381588	0	0	0	0	0	0.348	0	0.911	0.94
ARHGAP27	TFRC	9606.ENSP00000403323	9606.ENSP00000353224	0	0	0	0	0.055	0	0	0.468	0.475
ARHGAP27	FHL1	9606.ENSP00000403323	9606.ENSP00000377710	0	0	0	0	0.061	0.261	0	0.31	0.479
ARHGAP27	LMO7	9606.ENSP00000403323	9606.ENSP00000433352	0	0	0	0	0.061	0.261	0	0.31	0.479
ASXL1	HOXA10	9606.ENSP00000364839	9606.ENSP00000283921	0	0	0	0	0	0.377	0	0.197	0.478
BID	CTSB	9606.ENSP00000318822	9606.ENSP00000345672	0	0	0	0	0	0	0.6	0.212	0.671
BLNK	TCF3	9606.ENSP00000224337	9606.ENSP00000262965	0	0	0	0	0	0	0	0.421	0.42
BLNK	THY1	9606.ENSP00000224337	9606.ENSP00000284240	0	0	0	0	0	0	0	0.459	0.459
BSPRY	RAB11A	9606.ENSP00000363298	9606.ENSP00000261890	0	0	0	0	0	0.052	0	0.453	0.459
C1orf177	LMO7	9606.ENSP00000360320	9606.ENSP00000433352	0	0	0	0	0	0	0	0.456	0.456
C5AR1	SCIN	9606.ENSP00000347197	9606.ENSP00000297029	0	0	0	0	0	0	0	0.503	0.503
C5AR1	CXCL8	9606.ENSP00000347197	9606.ENSP00000306512	0	0	0	0	0.087	0	0.9	0.552	0.955
CAB39L	CDC25B	9606.ENSP00000479669	9606.ENSP00000245960	0	0	0	0	0.061	0.131	0	0.417	0.482
CAB39L	PRKAA2	9606.ENSP00000479669	9606.ENSP00000360290	0	0	0	0	0.061	0.181	0.9	0.166	0.927
CCNG2	E2F3	9606.ENSP00000315743	9606.ENSP00000262904	0	0	0	0	0.084	0.169	0	0.319	0.436
CDC25B	E2F3	9606.ENSP00000245960	9606.ENSP00000262904	0	0	0	0	0.063	0	0	0.393	0.407
CDC25B	UBE2C	9606.ENSP00000245960	9606.ENSP00000348838	0	0	0	0	0.13	0.126	0	0.383	0.49
CDCA5	UHRF1	9606.ENSP00000275517	9606.ENSP00000479617	0	0	0	0	0.764	0	0	0.237	0.812
CDCA5	UBE2C	9606.ENSP00000275517	9606.ENSP00000348838	0	0	0	0	0.785	0	0	0.491	0.886
CDCA5	RCC2	9606.ENSP00000275517	9606.ENSP00000364585	0	0	0	0	0.193	0	0.9	0.246	0.933
CEACAM1	CXCL8	9606.ENSP00000161559	9606.ENSP00000306512	0	0	0	0	0	0	0	0.574	0.574
CEACAM1	FBXO3	9606.ENSP00000161559	9606.ENSP00000265651	0	0	0	0	0	0	0	0.58	0.58
CEACAM1	SERPINB6	9606.ENSP00000161559	9606.ENSP00000484343	0	0	0	0	0	0	0.9	0.071	0.903
CEACAM1	PLAU	9606.ENSP00000161559	9606.ENSP00000361850	0	0	0	0	0	0	0.9	0.106	0.906
CEACAM1	PLAUR	9606.ENSP00000161559	9606.ENSP00000339328	0	0	0	0	0	0	0.9	0.165	0.913
CEBPB	KAT2B	9606.ENSP00000305422	9606.ENSP00000263754	0	0	0	0	0	0.454	0	0.467	0.697
CEBPB	MMP3	9606.ENSP00000305422	9606.ENSP00000299855	0	0	0	0	0.124	0	0	0.544	0.583
CEBPB	HOMER3	9606.ENSP00000305422	9606.ENSP00000439937	0	0	0	0	0.069	0.379	0	0.445	0.651
CEBPB	UBE2C	9606.ENSP00000305422	9606.ENSP00000348838	0	0	0	0	0	0	0.9	0.058	0.901
CEBPB	CXCL8	9606.ENSP00000305422	9606.ENSP00000306512	0	0	0	0	0.133	0.294	0.9	0.556	0.969
COL1A1	RASAL1	9606.ENSP00000225964	9606.ENSP00000450244	0	0	0	0	0	0	0	0.4	0.4
COL1A1	INHBA	9606.ENSP00000225964	9606.ENSP00000242208	0	0	0	0	0.138	0.08	0	0.333	0.425
COL1A1	MMP12	9606.ENSP00000225964	9606.ENSP00000458585	0	0	0	0	0.076	0	0	0.423	0.444
COL1A1	DPT	9606.ENSP00000225964	9606.ENSP00000356791	0	0	0	0	0.279	0	0	0.293	0.468
COL1A1	MFAP2	9606.ENSP00000225964	9606.ENSP00000364685	0	0	0	0	0.287	0	0	0.287	0.47
COL1A1	WISP1	9606.ENSP00000225964	9606.ENSP00000250160	0	0	0	0	0.327	0	0	0.289	0.502
COL1A1	CTHRC1	9606.ENSP00000225964	9606.ENSP00000330523	0	0	0	0	0.214	0	0	0.413	0.518
COL1A1	THY1	9606.ENSP00000225964	9606.ENSP00000284240	0	0	0	0	0.307	0	0	0.445	0.599
COL1A1	LOXL2	9606.ENSP00000225964	9606.ENSP00000373783	0	0	0	0	0.294	0	0	0.457	0.6
COL1A1	MMP1	9606.ENSP00000225964	9606.ENSP00000322788	0	0	0	0	0.128	0	0	0.569	0.608
COL1A1	MMP3	9606.ENSP00000225964	9606.ENSP00000299855	0	0	0	0	0.159	0	0	0.567	0.621
COL1A1	MMP13	9606.ENSP00000225964	9606.ENSP00000260302	0	0	0	0	0.061	0	0	0.673	0.68
COL1A1	SPP1	9606.ENSP00000225964	9606.ENSP00000378517	0	0	0	0	0.062	0	0	0.686	0.693
COL1A1	MMP9	9606.ENSP00000225964	9606.ENSP00000361405	0	0	0	0	0.077	0.328	0	0.605	0.733
COL1A1	LOX	9606.ENSP00000225964	9606.ENSP00000231004	0	0	0	0	0.408	0.305	0	0.597	0.82
COL1A1	LEPRE1	9606.ENSP00000225964	9606.ENSP00000236040	0	0	0	0	0.086	0	0.9	0.677	0.968
COL1A1	COL4A1	9606.ENSP00000225964	9606.ENSP00000364979	0	0	0.407	0.706	0.575	0	0.9	0.758	0.969
COL1A1	COL1A2	9606.ENSP00000225964	9606.ENSP00000297268	0	0	0.443	0.958	0.991	0.454	0.9	0.948	0.999
COL1A2	LOX	9606.ENSP00000297268	9606.ENSP00000231004	0	0	0	0	0.386	0.305	0	0.496	0.766
COL1A2	LEPRE1	9606.ENSP00000297268	9606.ENSP00000236040	0	0	0	0	0.063	0	0.9	0.706	0.97
COL1A2	WISP1	9606.ENSP00000297268	9606.ENSP00000250160	0	0	0	0	0.328	0	0	0.218	0.452
COL1A2	MMP13	9606.ENSP00000297268	9606.ENSP00000260302	0	0	0	0	0.06	0	0	0.533	0.543
COL1A2	THY1	9606.ENSP00000297268	9606.ENSP00000284240	0	0	0	0	0.539	0	0	0.281	0.654
COL1A2	CTHRC1	9606.ENSP00000297268	9606.ENSP00000330523	0	0	0	0	0.328	0	0	0.285	0.499
COL1A2	LOXL2	9606.ENSP00000297268	9606.ENSP00000373783	0	0	0	0	0.229	0	0	0.378	0.501
COL1A2	SPP1	9606.ENSP00000297268	9606.ENSP00000378517	0	0	0	0	0.087	0	0	0.516	0.539
COL1A2	MMP3	9606.ENSP00000297268	9606.ENSP00000299855	0	0	0	0	0.147	0	0	0.522	0.574
COL1A2	MMP1	9606.ENSP00000297268	9606.ENSP00000322788	0	0	0	0	0.111	0	0	0.646	0.672
COL1A2	MMP9	9606.ENSP00000297268	9606.ENSP00000361405	0	0	0	0	0.061	0.328	0	0.533	0.68
COL1A2	COL4A1	9606.ENSP00000297268	9606.ENSP00000364979	0	0	0.419	0.708	0.566	0.093	0.9	0.684	0.969
COL4A1	LOX	9606.ENSP00000364979	9606.ENSP00000231004	0	0	0	0	0.23	0	0	0.364	0.489
COL4A1	LEPRE1	9606.ENSP00000364979	9606.ENSP00000236040	0	0	0	0	0.061	0	0.9	0.065	0.904
COL4A1	PXDN	9606.ENSP00000364979	9606.ENSP00000252804	0	0	0	0	0.321	0	0	0.331	0.527
COL4A1	LAMC2	9606.ENSP00000364979	9606.ENSP00000264144	0	0	0	0	0.066	0	0	0.437	0.452
COL4A1	MMP9	9606.ENSP00000364979	9606.ENSP00000361405	0	0	0	0	0	0.328	0	0.405	0.583
COL4A1	UNC13B	9606.ENSP00000364979	9606.ENSP00000367756	0	0	0	0	0.097	0	0	0.386	0.421
COL4A1	LOXL2	9606.ENSP00000364979	9606.ENSP00000373783	0	0	0	0	0.235	0	0	0.313	0.452
CTHRC1	MMP9	9606.ENSP00000330523	9606.ENSP00000361405	0	0	0	0	0	0	0	0.551	0.552
CTSB	RAB11A	9606.ENSP00000345672	9606.ENSP00000261890	0	0	0	0	0	0.05	0	0.531	0.535
CTSB	IL18	9606.ENSP00000345672	9606.ENSP00000280357	0	0	0	0	0	0	0	0.544	0.544
CTSB	MMP3	9606.ENSP00000345672	9606.ENSP00000299855	0	0	0	0	0.071	0	0	0.42	0.438
CTSB	CXCL8	9606.ENSP00000345672	9606.ENSP00000306512	0	0	0	0	0.079	0	0	0.448	0.469
CTSB	MMP1	9606.ENSP00000345672	9606.ENSP00000322788	0	0	0	0	0.098	0	0	0.441	0.474
CTSB	PLAUR	9606.ENSP00000345672	9606.ENSP00000339328	0	0	0	0	0.088	0	0	0.502	0.527
CTSB	TMPRSS2	9606.ENSP00000345672	9606.ENSP00000381588	0	0	0	0	0	0	0	0.506	0.506
CTSB	MMP9	9606.ENSP00000345672	9606.ENSP00000361405	0	0	0	0	0.069	0	0	0.574	0.586
CTSB	PLAU	9606.ENSP00000345672	9606.ENSP00000361850	0	0	0	0	0.077	0.379	0	0.553	0.721
CXCL8	LOX	9606.ENSP00000306512	9606.ENSP00000231004	0	0	0	0	0.062	0	0	0.44	0.452
CXCL8	TNFAIP6	9606.ENSP00000306512	9606.ENSP00000243347	0	0	0	0	0.182	0.379	0	0.651	0.807
CXCL8	MMP13	9606.ENSP00000306512	9606.ENSP00000260302	0	0	0	0	0.062	0	0	0.738	0.744
CXCL8	RAB11A	9606.ENSP00000306512	9606.ENSP00000261890	0	0	0	0	0	0	0.9	0.137	0.91
CXCL8	MMP10	9606.ENSP00000306512	9606.ENSP00000279441	0	0	0	0	0.13	0	0	0.48	0.529
CXCL8	IL18	9606.ENSP00000306512	9606.ENSP00000280357	0	0	0	0	0.089	0	0	0.831	0.84
CXCL8	THY1	9606.ENSP00000306512	9606.ENSP00000284240	0	0	0	0	0	0	0	0.456	0.456
CXCL8	MMP3	9606.ENSP00000306512	9606.ENSP00000299855	0	0	0	0	0.107	0	0	0.681	0.703
CXCL8	ISG15	9606.ENSP00000306512	9606.ENSP00000368699	0	0	0	0	0	0	0	0.437	0.437
CXCL8	TYMP	9606.ENSP00000306512	9606.ENSP00000379038	0	0	0	0	0.088	0	0	0.442	0.469
CXCL8	SOCS1	9606.ENSP00000306512	9606.ENSP00000329418	0	0	0	0	0.083	0	0	0.473	0.496
CXCL8	MMP12	9606.ENSP00000306512	9606.ENSP00000458585	0	0	0	0	0.107	0	0	0.533	0.566
CXCL8	PLAU	9606.ENSP00000306512	9606.ENSP00000361850	0	0	0	0	0.143	0	0	0.54	0.589
CXCL8	SPP1	9606.ENSP00000306512	9606.ENSP00000378517	0	0	0	0	0.082	0	0	0.581	0.599
CXCL8	PLAUR	9606.ENSP00000306512	9606.ENSP00000339328	0	0	0	0	0.287	0	0	0.475	0.609
CXCL8	MMP1	9606.ENSP00000306512	9606.ENSP00000322788	0	0	0	0	0.19	0	0	0.705	0.751
CXCL8	UBE2C	9606.ENSP00000306512	9606.ENSP00000348838	0	0	0	0	0	0	0.9	0.06	0.901
CXCL8	MMP9	9606.ENSP00000306512	9606.ENSP00000361405	0	0	0	0	0.134	0.379	0	0.885	0.933
CYP2C18	EPHX2	9606.ENSP00000285979	9606.ENSP00000430269	0.056	0	0	0	0.07	0.081	0	0.478	0.523
DDX27	PNPT1	9606.ENSP00000483495	9606.ENSP00000400646	0.053	0	0	0	0.237	0.262	0	0.094	0.452
DPT	LOX	9606.ENSP00000356791	9606.ENSP00000231004	0	0	0	0	0.095	0.379	0	0.175	0.495
DPT	SPP1	9606.ENSP00000356791	9606.ENSP00000378517	0	0	0	0	0	0	0	0.4	0.4
DTYMK	TYMP	9606.ENSP00000304802	9606.ENSP00000379038	0.042	0	0	0	0	0	0	0.518	0.519
E2F3	KAT2B	9606.ENSP00000262904	9606.ENSP00000263754	0	0	0	0	0.061	0.126	0.9	0.258	0.931
EPHX2	RSPH3	9606.ENSP00000430269	9606.ENSP00000252655	0	0	0	0	0	0.652	0	0	0.652
ERBB3	GAB1	9606.ENSP00000267101	9606.ENSP00000262995	0	0	0	0	0.062	0.124	0.8	0.377	0.884
ERBB3	LAMC2	9606.ENSP00000267101	9606.ENSP00000264144	0	0	0	0	0	0.051	0.9	0.128	0.91
ERBB3	PTK6	9606.ENSP00000267101	9606.ENSP00000442460	0	0	0	0.676	0	0.418	0	0.361	0.481
ERBB3	MMP9	9606.ENSP00000267101	9606.ENSP00000361405	0	0	0	0	0	0	0	0.616	0.617
ETFDH	MRGBP	9606.ENSP00000426638	9606.ENSP00000359518	0	0	0	0	0	0	0	0.503	0.503
ETFDH	HSDL2	9606.ENSP00000426638	9606.ENSP00000381785	0	0	0	0	0.204	0	0	0.416	0.515
ETFDH	SUCLG2	9606.ENSP00000426638	9606.ENSP00000419325	0	0	0	0	0.175	0	0	0.42	0.501
FAM63A	ISG15	9606.ENSP00000354669	9606.ENSP00000368699	0	0	0	0	0.061	0.379	0	0.098	0.428
FCGR3B	THY1	9606.ENSP00000433642	9606.ENSP00000284240	0	0	0	0	0	0	0.9	0.057	0.901
FUT6	SLC35C1	9606.ENSP00000313398	9606.ENSP00000313318	0	0	0	0	0.063	0	0	0.435	0.448
GDPD3	PNPT1	9606.ENSP00000384363	9606.ENSP00000400646	0.078	0	0	0	0.062	0	0	0.425	0.459
GINS1	UBE2C	9606.ENSP00000262460	9606.ENSP00000348838	0	0	0	0	0.435	0	0	0.077	0.456
GTF2E1	KAT2B	9606.ENSP00000283875	9606.ENSP00000263754	0	0	0	0	0.08	0	0.9	0	0.904
GYS2	PPP1R3C	9606.ENSP00000261195	9606.ENSP00000238994	0	0	0	0	0.086	0.873	0.9	0.39	0.992
GYS2	PRKAA2	9606.ENSP00000261195	9606.ENSP00000360290	0	0	0	0	0.063	0.131	0.6	0.236	0.717
H2AFV	KAT2B	9606.ENSP00000308405	9606.ENSP00000263754	0	0	0	0	0	0.261	0.9	0.405	0.952
H2AFV	MRGBP	9606.ENSP00000308405	9606.ENSP00000359518	0	0	0	0	0.068	0.149	0	0.308	0.403
H2AFV	UHRF1	9606.ENSP00000308405	9606.ENSP00000479617	0	0	0	0	0.063	0.147	0.9	0.049	0.913
HOMER3	INADL	9606.ENSP00000439937	9606.ENSP00000360200	0	0	0	0	0	0.552	0	0	0.552
HOMER3	LGI1	9606.ENSP00000439937	9606.ENSP00000360472	0	0	0	0	0	0	0	0.538	0.538
HOXA10	KAT2B	9606.ENSP00000283921	9606.ENSP00000263754	0	0	0	0	0	0.387	0	0.151	0.458
HOXD10	PLAUR	9606.ENSP00000249501	9606.ENSP00000339328	0	0	0	0	0	0	0	0.477	0.477
HPGD	RAB11FIP1	9606.ENSP00000296522	9606.ENSP00000331342	0	0	0	0	0.062	0	0	0.637	0.645
IL18	WISP1	9606.ENSP00000280357	9606.ENSP00000250160	0	0	0	0	0	0	0	0.426	0.426
IL18	MMP1	9606.ENSP00000280357	9606.ENSP00000322788	0	0	0	0	0	0	0	0.403	0.403
IL18	SOCS1	9606.ENSP00000280357	9606.ENSP00000329418	0	0	0	0	0	0	0	0.42	0.42
IL18	MMP3	9606.ENSP00000280357	9606.ENSP00000299855	0	0	0	0	0	0	0	0.45	0.45
IL18	SPP1	9606.ENSP00000280357	9606.ENSP00000378517	0	0	0	0	0.062	0	0	0.669	0.676
IL18	MMP9	9606.ENSP00000280357	9606.ENSP00000361405	0	0	0	0	0.06	0	0	0.76	0.765
INHBA	TNFAIP6	9606.ENSP00000242208	9606.ENSP00000243347	0	0	0	0	0.117	0.13	0	0.434	0.527
INHBA	MMP1	9606.ENSP00000242208	9606.ENSP00000322788	0	0	0	0	0.155	0	0	0.496	0.556
ISG15	SOCS1	9606.ENSP00000368699	9606.ENSP00000329418	0	0	0	0	0.096	0	0	0.453	0.484
ISG15	UBE2C	9606.ENSP00000368699	9606.ENSP00000348838	0	0	0	0	0.055	0.312	0	0.208	0.441
ISG15	MYO6	9606.ENSP00000368699	9606.ENSP00000358994	0	0	0	0	0	0.578	0	0.066	0.589
ISG15	UBL3	9606.ENSP00000368699	9606.ENSP00000370055	0	0	0	0	0	0	0	0.643	0.643
KAT2B	TCF3	9606.ENSP00000263754	9606.ENSP00000262965	0	0	0	0	0.061	0.553	0	0.229	0.648
KAT2B	THRB	9606.ENSP00000263754	9606.ENSP00000379904	0	0	0	0	0.061	0.194	0.6	0.177	0.717
KAT2B	MRGBP	9606.ENSP00000263754	9606.ENSP00000359518	0	0	0	0	0.061	0.306	0.54	0.37	0.786
KIAA0930	USP6NL	9606.ENSP00000251993	9606.ENSP00000277575	0	0	0	0	0	0	0	0.619	0.619
LAMB4	LAMC2	9606.ENSP00000373433	9606.ENSP00000264144	0	0	0	0.569	0.157	0.195	0	0.441	0.419
LAMC2	MMP13	9606.ENSP00000264144	9606.ENSP00000260302	0	0	0	0	0	0	0.9	0.186	0.915
LAMC2	MMP19	9606.ENSP00000264144	9606.ENSP00000313437	0	0	0	0	0	0	0.9	0	0.9
LAMC2	MMP12	9606.ENSP00000264144	9606.ENSP00000458585	0	0	0	0	0	0	0.9	0.15	0.911
LAMC2	MMP3	9606.ENSP00000264144	9606.ENSP00000299855	0	0	0	0	0	0	0.9	0.211	0.917
LIMK1	LMO7	9606.ENSP00000336740	9606.ENSP00000433352	0	0	0	0	0.061	0.083	0	0.367	0.407
LIMK1	PLXNA1	9606.ENSP00000336740	9606.ENSP00000377061	0	0	0	0	0.062	0.085	0.9	0.185	0.92
LMO7	LNX1	9606.ENSP00000433352	9606.ENSP00000263925	0	0	0	0	0	0.05	0.9	0.168	0.914
LMO7	SOCS1	9606.ENSP00000433352	9606.ENSP00000329418	0	0	0	0	0	0	0.9	0	0.9
LMO7	SORBS2	9606.ENSP00000433352	9606.ENSP00000347852	0	0	0	0	0.062	0.172	0	0.342	0.444
LMO7	UBE2C	9606.ENSP00000433352	9606.ENSP00000348838	0	0	0	0	0	0	0.9	0	0.9
LMO7	PLAU	9606.ENSP00000433352	9606.ENSP00000361850	0	0	0	0	0	0	0	0.542	0.542
LNX1	SOCS1	9606.ENSP00000263925	9606.ENSP00000329418	0	0	0	0	0.052	0	0.9	0	0.901
LNX1	UBE2C	9606.ENSP00000263925	9606.ENSP00000348838	0	0	0	0	0	0.35	0.9	0.112	0.937
LOX	SPP1	9606.ENSP00000231004	9606.ENSP00000378517	0	0	0	0	0.064	0	0	0.445	0.458
LOX	MMP3	9606.ENSP00000231004	9606.ENSP00000299855	0	0	0	0	0.169	0	0	0.439	0.514
LOX	MMP1	9606.ENSP00000231004	9606.ENSP00000322788	0	0	0	0	0.194	0	0	0.431	0.522
LOX	MMP9	9606.ENSP00000231004	9606.ENSP00000361405	0	0	0	0	0.061	0	0	0.571	0.579
LOX	LOXL2	9606.ENSP00000231004	9606.ENSP00000373783	0	0	0	0.817	0.249	0	0.9	0.804	0.933
LOX	MFAP2	9606.ENSP00000231004	9606.ENSP00000364685	0	0	0	0	0.127	0	0.9	0.455	0.948
LOXL2	MFAP2	9606.ENSP00000373783	9606.ENSP00000364685	0	0	0	0	0.152	0	0.9	0.137	0.92
LOXL2	TYMP	9606.ENSP00000373783	9606.ENSP00000379038	0	0	0	0	0	0	0	0.417	0.417
LRRC8D	ZNF662	9606.ENSP00000338887	9606.ENSP00000329264	0	0	0	0	0	0.053	0	0.44	0.447
MMP1	MMP13	9606.ENSP00000322788	9606.ENSP00000260302	0	0	0	0.935	0.077	0	0.9	0.863	0.909
MMP1	MMP10	9606.ENSP00000322788	9606.ENSP00000279441	0	0	0.28	0.948	0.361	0	0.9	0.76	0.936
MMP1	MMP3	9606.ENSP00000322788	9606.ENSP00000299855	0	0	0.298	0.953	0.529	0	0.9	0.921	0.953
MMP1	SPP1	9606.ENSP00000322788	9606.ENSP00000378517	0	0	0	0	0.049	0	0	0.516	0.52
MMP1	PLAUR	9606.ENSP00000322788	9606.ENSP00000339328	0	0	0	0	0.104	0	0	0.52	0.551
MMP1	PLAU	9606.ENSP00000322788	9606.ENSP00000361850	0	0	0	0	0.198	0	0	0.572	0.642
MMP1	MMP9	9606.ENSP00000322788	9606.ENSP00000361405	0	0	0	0.75	0.518	0	0.9	0.91	0.961
MMP10	MMP13	9606.ENSP00000279441	9606.ENSP00000260302	0	0	0.236	0.941	0.084	0	0.9	0.756	0.909
MMP10	PLAU	9606.ENSP00000279441	9606.ENSP00000361850	0	0	0	0	0.097	0	0	0.403	0.438
MMP10	MMP9	9606.ENSP00000279441	9606.ENSP00000361405	0	0	0	0.786	0.53	0.379	0.9	0.83	0.973
MMP10	MMP3	9606.ENSP00000279441	9606.ENSP00000299855	0	0	0.448	0.98	0.311	0.825	0.9	0.805	0.987
MMP12	PLAUR	9606.ENSP00000458585	9606.ENSP00000339328	0	0	0	0	0.065	0.379	0.9	0.384	0.959
MMP12	MMP9	9606.ENSP00000458585	9606.ENSP00000361405	0	0	0	0.732	0.506	0	0	0.816	0.613
MMP12	PLAU	9606.ENSP00000458585	9606.ENSP00000361850	0	0	0	0	0.076	0	0	0.397	0.419
MMP12	SPP1	9606.ENSP00000458585	9606.ENSP00000378517	0	0	0	0	0.086	0	0	0.475	0.5
MMP13	PLAU	9606.ENSP00000260302	9606.ENSP00000361850	0	0	0	0	0.061	0	0	0.442	0.454
MMP13	SPP1	9606.ENSP00000260302	9606.ENSP00000378517	0	0	0	0	0.063	0	0	0.777	0.782
MMP13	MMP3	9606.ENSP00000260302	9606.ENSP00000299855	0	0	0.249	0.944	0.085	0	0.9	0.893	0.91
MMP13	MMP9	9606.ENSP00000260302	9606.ENSP00000361405	0	0	0	0.797	0.064	0	0.9	0.878	0.919
MMP3	PLAUR	9606.ENSP00000299855	9606.ENSP00000339328	0	0	0	0	0.07	0	0	0.483	0.498
MMP3	PLAU	9606.ENSP00000299855	9606.ENSP00000361850	0	0	0	0	0.098	0	0	0.593	0.618
MMP3	MMP9	9606.ENSP00000299855	9606.ENSP00000361405	0	0	0	0.791	0.518	0	0.9	0.911	0.959
MMP3	SPP1	9606.ENSP00000299855	9606.ENSP00000378517	0	0	0	0	0.062	0.379	0.9	0.578	0.972
MMP9	TNFAIP6	9606.ENSP00000361405	9606.ENSP00000243347	0	0	0	0	0.155	0	0.9	0.527	0.956
MMP9	WISP1	9606.ENSP00000361405	9606.ENSP00000250160	0	0	0	0	0	0	0	0.542	0.542
MMP9	PLA2G7	9606.ENSP00000361405	9606.ENSP00000274793	0	0	0	0	0.184	0	0	0.31	0.412
MMP9	PLAUR	9606.ENSP00000361405	9606.ENSP00000339328	0	0	0	0	0.111	0	0	0.669	0.693
MMP9	PRSS3	9606.ENSP00000361405	9606.ENSP00000354280	0	0	0	0	0	0	0.9	0.089	0.905
MMP9	NCF2	9606.ENSP00000361405	9606.ENSP00000356505	0	0	0	0	0.228	0	0.65	0.244	0.777
MMP9	TYMP	9606.ENSP00000361405	9606.ENSP00000379038	0	0	0	0	0.141	0	0	0.352	0.419
MMP9	PLAU	9606.ENSP00000361405	9606.ENSP00000361850	0	0	0	0	0.076	0	0	0.713	0.724
MMP9	SPP1	9606.ENSP00000361405	9606.ENSP00000378517	0	0	0	0	0.109	0	0	0.804	0.818
MYO6	TAX1BP1	9606.ENSP00000358994	9606.ENSP00000379612	0	0	0	0	0	0.379	0	0.244	0.511
MYOC	PXDN	9606.ENSP00000037502	9606.ENSP00000252804	0	0	0	0	0	0	0	0.565	0.565
OBFC1	USB1	9606.ENSP00000224950	9606.ENSP00000219281	0	0	0	0	0	0	0	0.555	0.555
PIAS1	SOCS1	9606.ENSP00000249636	9606.ENSP00000329418	0	0	0	0	0	0	0	0.564	0.564
PIAS1	THRB	9606.ENSP00000249636	9606.ENSP00000379904	0	0	0	0	0	0.079	0.9	0	0.903
PLAU	PLAUR	9606.ENSP00000361850	9606.ENSP00000339328	0	0	0	0	0.221	0.723	0.9	0.967	0.999
PLAU	SPP1	9606.ENSP00000361850	9606.ENSP00000378517	0	0	0	0	0.075	0	0	0.442	0.462
PLAU	SERPINB6	9606.ENSP00000361850	9606.ENSP00000484343	0	0	0	0	0.065	0.358	0.9	0.15	0.942
PLAUR	SPP1	9606.ENSP00000339328	9606.ENSP00000378517	0	0	0	0	0.062	0	0	0.398	0.411
PLAUR	SERPINB6	9606.ENSP00000339328	9606.ENSP00000484343	0	0	0	0	0.055	0	0.9	0.05	0.902
PMEPA1	TMPRSS2	9606.ENSP00000345826	9606.ENSP00000381588	0	0	0	0	0	0	0	0.547	0.547
PRKAA2	PRKAR2A	9606.ENSP00000360290	9606.ENSP00000265563	0	0	0	0	0.083	0.157	0.54	0.641	0.855
PRKAR2A	RSPH3	9606.ENSP00000265563	9606.ENSP00000252655	0	0	0	0	0.064	0.668	0	0.062	0.683
PRSS3	TNFAIP6	9606.ENSP00000354280	9606.ENSP00000243347	0	0	0	0	0.051	0	0.9	0.05	0.901
RAB11A	USP6NL	9606.ENSP00000261890	9606.ENSP00000277575	0	0	0	0	0.063	0.162	0	0.472	0.55
RAB11A	TFRC	9606.ENSP00000261890	9606.ENSP00000353224	0	0	0	0	0	0.063	0	0.732	0.739
RAB11A	RAB11FIP1	9606.ENSP00000261890	9606.ENSP00000331342	0	0	0	0	0	0.379	0.8	0.753	0.966
RSPH3	WDR66	9606.ENSP00000252655	9606.ENSP00000288912	0	0	0	0	0.117	0	0	0.773	0.791
SAMD5	SASH1	9606.ENSP00000356444	9606.ENSP00000356437	0	0.384	0	0	0.061	0	0	0.559	0.723
SNX9	WISP1	9606.ENSP00000376024	9606.ENSP00000250160	0	0	0	0	0	0	0	0.659	0.659
SNX9	SORT1	9606.ENSP00000376024	9606.ENSP00000256637	0	0	0	0	0.083	0	0.9	0.05	0.905
SNX9	TFRC	9606.ENSP00000376024	9606.ENSP00000353224	0	0	0	0	0	0	0.9	0.36	0.933
SOCS1	UBE2C	9606.ENSP00000329418	9606.ENSP00000348838	0	0	0	0	0.061	0	0.9	0.065	0.904
SORT1	TFRC	9606.ENSP00000256637	9606.ENSP00000353224	0	0	0	0	0.087	0	0.9	0.267	0.927
SPP1	STC2	9606.ENSP00000378517	9606.ENSP00000265087	0	0	0	0	0	0	0.9	0.171	0.913
SPP1	THY1	9606.ENSP00000378517	9606.ENSP00000284240	0	0	0	0	0.116	0	0	0.539	0.575
STC2	UBE2C	9606.ENSP00000265087	9606.ENSP00000348838	0	0	0	0	0.09	0	0	0.51	0.535
TFRC	THY1	9606.ENSP00000353224	9606.ENSP00000284240	0	0	0	0	0	0	0	0.597	0.597
TMPRSS2	UBE2C	9606.ENSP00000381588	9606.ENSP00000348838	0	0	0	0	0	0	0	0.521	0.521
UBE2C	UHRF1	9606.ENSP00000348838	9606.ENSP00000479617	0	0	0	0	0.518	0	0	0.357	0.677
